# Supplementary material for: Immune and hormonal modulation in the postprandial period of bullfrogs (Lithobates catesbeianus)
Source: Oxford University Press journal article supplement (doi:10.1242/jeb.243153), 2021-10-27
Supplement: jeb243153supp.pdf [file jeb243153supp.pdf]

**Table S1. Fish feed nutritional information (Poli-Peixe 400 Intensivo, Nutrição Animal- Poli-Nutri, CNPJ: 60.210.515/0001-48, #400 E)**

| <b>Warranty levels per kg of product</b> |          |
|------------------------------------------|----------|
| Crude Protein (min.)                     | 40%      |
| Humidity (max.)                          | 12%      |
| Ethereal Extract (min.)                  | 6%       |
| Fibrous Matter (max.)                    | 8%       |
| Mineral Matter (max.)                    | 12%      |
| Calcium (max.)                           | 2.5%     |
| Phosphor (min.)                          | 0.8%     |
| <b>Enrichment per kg of product</b>      |          |
| Vitamin A                                | 12000 UI |
| Vitamin D3                               | 3400 UI  |
| Vitamin E                                | 150 mg   |
| Vitamin K                                | 20 mg    |
| Vitamin B1 (Thiamine)                    | 30 mg    |
| Vitamin B2 (Riboflavin)                  | 30 mg    |
| Vitamin B6 (Pyridoxine)                  | 30 mg    |
| B12 vitamin                              | 30 mcg   |
| Niacin                                   | 150 mg   |
| Calcium pantothenate                     | 78.75 mg |
| Folic acid                               | 8.12 mg  |
| Biotin                                   | 0.25 mg  |
| Vitamin C                                | 300 mg   |
| Choline chloride                         | 1000 mg  |
| Copper                                   | 25 mg    |
| Manganese                                | 68.75 mg |
| Zinc                                     | 112.5 mg |
| Iodine                                   | 1.25 mg  |
| Cobalt                                   | 0.75 mg  |
| Selenium                                 | 0.3 mg   |
| Antioxidant                              | 125 mg   |
| Fungistatic Antifungal Additive          | 1000 mg  |
